# Supplementary material
Source: PubMed Central journal article supplement (PMC3584347)
Supplement: NIHMS434093-supplement-1.pdf [file NIHMS434093-supplement-1.pdf]

## SUPPLEMENTAL MATERIAL

**Table-S-I: Qualitative evaluation of DSC perfusion**

|                             | Image quality<br>(Median,<br>Range) | Perfusion abnormality                                                         | Location                                  |
|-----------------------------|-------------------------------------|-------------------------------------------------------------------------------|-------------------------------------------|
| <b>Pretreatment (n=23)*</b> |                                     |                                                                               |                                           |
| Observer-1                  | 3, 2-3                              | Hypoperfusion n= 22<br>Both hypo & hyperperfusion n= 1                        | Both cortical and BG n=18<br>Cortical n=5 |
| Observer-2                  | 3, 2-3                              | Hypoperfusion n=21<br>Both hypo & hyperperfusion n=2                          | Both cortical and BG n=17<br>Cortical n=6 |
| p- value<br>(Wilcoxon)      | 0.9                                 | 0.6                                                                           | 0.73                                      |
| K value                     | 0.95                                | 0.83                                                                          | K=0.8                                     |
| <b>Posttreatment (n=25)</b> |                                     |                                                                               |                                           |
| Observer-1                  | 3, 2-3                              | Hypoperfusion n= 6<br>Both hypo & hyperperfusion n= 12<br>Hyperperfusion n= 7 | Both cortical and BG n=19<br>Cortical n=6 |
| Observer-2                  | 3, 2-3                              | Hypoperfusion n= 6<br>Both hypo & hyperperfusion n= 11<br>Hyperperfusion n= 8 | Both cortical and BG n=18<br>Cortical n=7 |
| p- value<br>(Wilcoxon)      | 1                                   | 0.86                                                                          | 1                                         |
| K value                     | 1                                   | 0.95                                                                          | 0.91                                      |

\* Two studies were not diagnostic

**Table-S-II: Qualitative evaluation of ASL perfusion**

|                             | Image quality<br>(Median, Range) | Perfusion abnormality                                                                                    | Location                                   |
|-----------------------------|----------------------------------|----------------------------------------------------------------------------------------------------------|--------------------------------------------|
| <b>Pretreatment (n=22)*</b> |                                  |                                                                                                          |                                            |
| Observer-1                  | 2.3, 2-3                         | Hypoperfusion n= 16<br>Both hypo & hyperperfusion n= 5<br>No perfusion defect n=1                        | Both cortical and BG n=13<br>Cortical n=8  |
| Observer-2                  | 2, 2-3                           | Hypoperfusion n= 15<br>Both hypo & hyperperfusion n= 6<br>No perfusion defect n=1                        | Both cortical and BG n=12<br>Cortical n=9  |
| p-value<br>(Wilcoxon)       | 0.3                              | 0.78                                                                                                     | 0.7                                        |
| K value                     | 0.62                             | 0.85                                                                                                     | K=0.67                                     |
| <b>Posttreatment (n=25)</b> |                                  |                                                                                                          |                                            |
| Observer-1                  | 2.1, 2-3                         | Hypoperfusion n= 12<br>Both hypo & hyperperfusion n= 4<br>Hyperperfusion n= 5<br>No perfusion defect n=4 | Both cortical and BG n=13<br>Cortical n=8  |
| Observer-2                  | 2, 2-3                           | Hypoperfusion n= 10<br>Both hypo & hyperperfusion n= 7<br>Hyperperfusion n= 4<br>No perfusion defect n=4 | Both cortical and BG n=10<br>Cortical n=11 |
| p-value<br>(Wilcoxon)       | 0.65                             | 0.36                                                                                                     | 0.5                                        |
| K value                     | 0.57                             | 0.64                                                                                                     | K=0.53                                     |

\* Three studies were not diagnostic
